# Supplementary material
Source: publisher figshare collection journal article supplement (https://tandf.figshare.com/ndownloader/files/15051611)
Supplement: Supplementary file 1 [file 15051611]

## Sheet: #1 - Sig. diff. OTUs in UT
Significantly different OTUs in the Untreated line
0 meters vs. 100 meters															0 meters vs. 200 meters															100 meters vs. 200 meters
	Prevalence		Counts													Prevalence		Counts													Prevalence		Counts
OTU number	0 meters	100 meters	0 meters	100 meters		p-value		Kingdom	Phylum	Class	Order	Family	Genus		OTU number	0 meters	200 meters	0 meters	200 meters		p-value		Kingdom	Phylum	Class	Order	Family	Genus		OTU number	100 meters	200 meters	100 meters	200 meters		p-value		Kingdom	Phylum	Class	Order	Family	Genus
OTU72	1	1	304	26		4.62474e-10		Bacteria	Firmicutes	Clostridia	Clostridiales	NA	NA		OTU13	1	1	115	911		1.6294e-09		Bacteria	Firmicutes	Clostridia	Clostridiales	Ruminococcaceae	NA		OTU7	1	1	885	55		2.48894e-12		Archaea	Euryarchaeota	Thermoplasmata	Methanomassiliicoccales	Methanomassiliicoccaceae	Methanomassiliicoccus
OTU14	1	1	320	22		1.76689e-08		Bacteria	Firmicutes	Clostridia	Clostridiales	Natranaerovirga	NA		OTU1	1	1	409	2041		1.49742e-08		Bacteria	Synergistetes	Synergistia	Synergistales	Synergistaceae	Cloacibacillus		OTU64	1	1	43	195		0.00446654		Bacteria	Firmicutes	Clostridia	Clostridiales	Peptostreptococcaceae	Acetoanaerobium
OTU7	1	1	68	885		9.91825e-06		Archaea	Euryarchaeota	Thermoplasmata	Methanomassiliicoccales	Methanomassiliicoccaceae	Methanomassiliicoccus		OTU46	1	1	21	127		9.10231e-08		Archaea	Euryarchaeota	Methanomicrobia	Methanomicrobiales	Methanospirillaceae	Methanospirillum		OTU72	1	1	26	86		0.00481261		Bacteria	Firmicutes	Clostridia	Clostridiales	NA	NA
OTU18	1	1	423	37		6.2915e-05		Bacteria	Firmicutes	Clostridia	Clostridiales	Peptostreptococcaceae	Romboutsia		OTU30	1	1	20	133		9.26339e-08		Bacteria	Firmicutes	NA	NA	NA	NA		OTU6	1	1	572	247		0.00784745		Bacteria	Firmicutes	Clostridia	Clostridiales	Clostridiales_Incertae_Sedis_XIII	Anaerovorax
OTU1	1	1	409	1767		8.41182e-05		Bacteria	Synergistetes	Synergistia	Synergistales	Synergistaceae	Cloacibacillus		OTU2	1	1	488	2045		2.15921e-07		Bacteria	Synergistetes	Synergistia	Synergistales	Synergistaceae	Cloacibacillus		OTU58	1	1	118	66		0.0100817		Bacteria	Firmicutes	Clostridia	Clostridiales	Clostridiaceae_1	Youngiibacter
OTU74	1	1	80	26		0.000756127		Bacteria	Firmicutes	Clostridia	Clostridiales	Ruminococcaceae	NA		OTU15	1	1	1102	121		4.73616e-07		Bacteria	Proteobacteria	Epsilonproteobacteria	Campylobacterales	Campylobacteraceae	Arcobacter		OTU49	1	1	55	247		0.0104003		Bacteria	Firmicutes	Clostridia	Clostridiales	Ruminococcaceae	Anaerofilum
OTU2	1	1	488	1498		0.00143252		Bacteria	Synergistetes	Synergistia	Synergistales	Synergistaceae	Cloacibacillus		OTU51	1	1	63	205		6.10198e-05		Bacteria	Firmicutes	Bacilli	Lactobacillales	Carnobacteriaceae	NA		OTU11	1	1	89	315		0.0119844		Bacteria	Firmicutes	Clostridia	Clostridiales	Ruminococcaceae	Saccharofermentans
OTU21	1	1	88	253		0.00237392		Archaea	Euryarchaeota	Thermoplasmata	Methanomassiliicoccales	Methanomassiliicoccaceae	Methanomassiliicoccus		OTU60	1	1	324	55		0.000210227		Bacteria	Fusobacteria	Fusobacteriia	Fusobacteriales	Leptotrichiaceae	Streptobacillus		OTU21	1	1	253	152		0.0232311		Archaea	Euryarchaeota	Thermoplasmata	Methanomassiliicoccales	Methanomassiliicoccaceae	Methanomassiliicoccus
OTU47	1	1	387	47		0.0052273		Bacteria	Firmicutes	Clostridia	Clostridiales	Clostridiales_Incertae_Sedis_XII	Fusibacter		OTU18	1	1	423	101		0.000346538		Bacteria	Firmicutes	Clostridia	Clostridiales	Peptostreptococcaceae	Romboutsia		OTU26	1	1	43	163		0.0288615		Bacteria	Proteobacteria	Epsilonproteobacteria	Campylobacterales	Campylobacteraceae	Sulfurospirillum
OTU30	1	1	20	44		0.00585315		Bacteria	Firmicutes	NA	NA	NA	NA		OTU41	1	1	71	199		0.000561687		Bacteria	Firmicutes	Clostridia	Clostridiales	NA	NA		OTU20	1	1	114	373		0.0291495		Bacteria	Firmicutes	Clostridia	Clostridiales	Clostridiaceae_1	Youngiibacter
OTU15	1	1	1102	115		0.0102289		Bacteria	Proteobacteria	Epsilonproteobacteria	Campylobacterales	Campylobacteraceae	Arcobacter		OTU57	1	1	61	135		0.000716649		Bacteria	Firmicutes	Clostridia	Clostridiales	Ruminococcaceae	NA		OTU13	1	1	291	911		0.0311331		Bacteria	Firmicutes	Clostridia	Clostridiales	Ruminococcaceae	NA
OTU26	1	1	275	43		0.0209757		Bacteria	Proteobacteria	Epsilonproteobacteria	Campylobacterales	Campylobacteraceae	Sulfurospirillum		OTU78	1	1	49	122		0.00120123		Bacteria	Elusimicrobia	Endomicrobia	Candidatus_Endomicrobium	NA	NA		OTU18	1	1	37	101		0.0380888		Bacteria	Firmicutes	Clostridia	Clostridiales	Peptostreptococcaceae	Romboutsia
OTU46	1	1	21	75		0.0210561		Archaea	Euryarchaeota	Methanomicrobia	Methanomicrobiales	Methanospirillaceae	Methanospirillum		OTU34	1	1	114	265		0.00123244		Bacteria	Elusimicrobia	Endomicrobia	Candidatus_Endomicrobium	NA	NA		OTU59	1	1	78	37		0.0407281		Bacteria	Firmicutes	Clostridia	Clostridiales	Ruminococcaceae	Clostridium_III
OTU38	1	1	381	78		0.036048		Bacteria	Firmicutes	Clostridia	Clostridiales	Peptostreptococcaceae	Proteocatella		OTU4	1	1	367	708		0.00146027		Bacteria	Synergistetes	Synergistia	Synergistales	Synergistaceae	Cloacibacillus
OTU4	1	1	367	580		0.0477995		Bacteria	Synergistetes	Synergistia	Synergistales	Synergistaceae	Cloacibacillus		OTU140	1	1	72	21		0.00207208		Bacteria	NA	NA	NA	NA	NA		OTU35	1	0	182	0		4.10327e-10		Bacteria	Chloroflexi	Anaerolineae	Anaerolineales	Anaerolineaceae	Levilinea
															OTU21	1	1	88	152		0.00264492		Archaea	Euryarchaeota	Thermoplasmata	Methanomassiliicoccales	Methanomassiliicoccaceae	Methanomassiliicoccus		OTU71	1	0	95	0		3.59724e-08		Bacteria	Firmicutes	Bacilli	Lactobacillales	Carnobacteriaceae	Trichococcus
OTU80	1	0	375	0		2.12772e-08		Bacteria	Firmicutes	Clostridia	Clostridiales	Clostridiales_Incertae_Sedis_XII	Fusibacter		OTU22	1	1	546	151		0.00309577		Bacteria	Firmicutes	Clostridia	Clostridiales	Clostridiales_Incertae_Sedis_XIII	Anaerovorax		OTU93	1	0	102	0		5.19157e-08		Bacteria	Synergistetes	Synergistia	Synergistales	Synergistaceae	Cloacibacillus
OTU44	1	0	234	0		2.30542e-08		Bacteria	Firmicutes	Clostridia	Clostridiales	Clostridiaceae_1	Clostridium_sensu_stricto		OTU3	1	1	686	1209		0.00376326		Bacteria	Synergistetes	Synergistia	Synergistales	Synergistaceae	Cloacibacillus		OTU62	1	0	102	0		5.06379e-07		Bacteria	Synergistetes	Synergistia	Synergistales	Synergistaceae	Cloacibacillus
OTU79	1	0	255	0		8.51737e-08		Bacteria	Firmicutes	Clostridia	Clostridiales	Clostridiales_Incertae_Sedis_XII	Fusibacter		OTU49	1	1	136	247		0.00443743		Bacteria	Firmicutes	Clostridia	Clostridiales	Ruminococcaceae	Anaerofilum		OTU107	1	0	59	0		4.02692e-06		Bacteria	Firmicutes	Clostridia	Clostridiales	Clostridiales_Incertae_Sedis_XIII	Anaerovorax
OTU45	1	0	194	0		3.30067e-07		Bacteria	Firmicutes	Clostridia	Clostridiales	Clostridiaceae_1	Clostridium_sensu_stricto		OTU63	1	1	59	117		0.0164894		Bacteria	Firmicutes	Clostridia	Clostridiales	Lachnospiraceae	NA		OTU47	1	0	47	0		5.67775e-06		Bacteria	Firmicutes	Clostridia	Clostridiales	Clostridiales_Incertae_Sedis_XII	Fusibacter
OTU50	1	0	153	0		8.62758e-07		Bacteria	Firmicutes	Clostridia	Clostridiales	Peptostreptococcaceae	Intestinibacter		OTU72	1	1	304	86		0.0206432		Bacteria	Firmicutes	Clostridia	Clostridiales	NA	NA		OTU204	1	0	30	0		0.00170671		Bacteria	Chloroflexi	Anaerolineae	Anaerolineales	Anaerolineaceae	Bellilinea
OTU141	1	0	62	0		6.15524e-06		Bacteria	Firmicutes	Clostridia	Clostridiales	Lachnospiraceae	Clostridium_XlVa		OTU50	1	1	153	46		0.0216498		Bacteria	Firmicutes	Clostridia	Clostridiales	Peptostreptococcaceae	Intestinibacter		OTU277	1	0	11	0		0.0230387		Bacteria	Synergistetes	Synergistia	Synergistales	Synergistaceae	Cloacibacillus
OTU159	1	0	74	0		9.92868e-06		Bacteria	Firmicutes	Negativicutes	Selenomonadales	Veillonellaceae	NA		OTU38	1	1	381	146		0.0273365		Bacteria	Firmicutes	Clostridia	Clostridiales	Peptostreptococcaceae	Proteocatella
OTU138	1	0	67	0		1.77798e-05		Bacteria	Firmicutes	Clostridia	Clostridiales	Lachnospiraceae	Roseburia		OTU85	1	1	67	23		0.0386157		Bacteria	Synergistetes	Synergistia	Synergistales	Synergistaceae	Cloacibacillus		OTU94	0	1	0	98		1.30209e-08		Bacteria	Firmicutes	Clostridia	Clostridiales	Clostridiales_Incertae_Sedis_XIII	Anaerovorax
OTU103	1	0	71	0		1.93098e-05		Bacteria	Firmicutes	Clostridia	Clostridiales	Peptostreptococcaceae	Terrisporobacter																	OTU31	0	1	0	125		1.80376e-07		Bacteria	Firmicutes	Clostridia	Clostridiales	Clostridiales_Incertae_Sedis_XIII	Anaerovorax
OTU101	1	0	226	0		2.94669e-05		Bacteria	Firmicutes	Clostridia	Clostridiales	Lachnospiraceae	Clostridium_XlVa		OTU47	1	0	387	0		8.83457e-15		Bacteria	Firmicutes	Clostridia	Clostridiales	Clostridiales_Incertae_Sedis_XII	Fusibacter		OTU70	0	1	0	61		1.05639e-06		Bacteria	Synergistetes	Synergistia	Synergistales	Synergistaceae	Fretibacterium
OTU222	1	0	48	0		4.43378e-05		Bacteria	Firmicutes	Clostridia	Clostridiales	Natranaerovirga	NA		OTU80	1	0	375	0		1.07898e-14		Bacteria	Firmicutes	Clostridia	Clostridiales	Clostridiales_Incertae_Sedis_XII	Fusibacter		OTU75	0	1	0	69		3.96951e-06		Bacteria	Firmicutes	Clostridia	Clostridiales	Ruminococcaceae	NA
OTU99	1	0	176	0		4.79045e-05		Bacteria	Firmicutes	Clostridia	Clostridiales	Clostridiales_Incertae_Sedis_XII	Fusibacter		OTU101	1	0	226	0		2.79834e-11		Bacteria	Firmicutes	Clostridia	Clostridiales	Lachnospiraceae	Clostridium_XlVa		OTU114	0	1	0	54		4.05984e-06		Bacteria	Firmicutes	Clostridia	Clostridiales	Lachnospiraceae	Hespellia
OTU31	1	0	146	0		4.83084e-05		Bacteria	Firmicutes	Clostridia	Clostridiales	Clostridiales_Incertae_Sedis_XIII	Anaerovorax		OTU71	1	0	120	0		3.74387e-10		Bacteria	Firmicutes	Bacilli	Lactobacillales	Carnobacteriaceae	Trichococcus		OTU190	0	1	0	38		2.32433e-05		Bacteria	Elusimicrobia	Elusimicrobia	Elusimicrobiales	Elusimicrobiaceae	Elusimicrobium
OTU215	1	0	78	0		5.24923e-05		Bacteria	Firmicutes	Clostridia	Clostridiales	Ruminococcaceae	Ruminococcus		OTU39	1	0	86	0		1.03539e-09		Bacteria	Synergistetes	Synergistia	Synergistales	Synergistaceae	Fretibacterium		OTU88	0	1	0	47		3.0627e-05		Bacteria	Firmicutes	Clostridia	Clostridiales	Ruminococcaceae	NA
OTU136	1	0	75	0		5.28543e-05		Bacteria	Firmicutes	Clostridia	Clostridiales	Clostridiales_Incertae_Sedis_XII	Fusibacter		OTU120	1	0	151	0		4.89502e-09		Bacteria	Proteobacteria	Epsilonproteobacteria	Campylobacterales	Campylobacteraceae	Arcobacter		OTU89	0	1	0	39		3.17766e-05		Bacteria	Proteobacteria	Deltaproteobacteria	Bdellovibrionales	Bdellovibrionaceae	Vampirovibrio
OTU189	1	0	70	0		7.19051e-05		Bacteria	Firmicutes	Clostridia	Clostridiales	Clostridiales_Incertae_Sedis_XI	Sedimentibacter		OTU103	1	0	71	0		2.43112e-08		Bacteria	Firmicutes	Clostridia	Clostridiales	Peptostreptococcaceae	Terrisporobacter		OTU197	0	1	0	52		3.19634e-05		Bacteria	Firmicutes	Clostridia	Clostridiales	Ruminococcaceae	Faecalibacterium
OTU227	1	0	55	0		7.98865e-05		Bacteria	Firmicutes	Clostridia	Clostridiales	Ruminococcaceae	Acetanaerobacterium		OTU136	1	0	75	0		2.49836e-08		Bacteria	Firmicutes	Clostridia	Clostridiales	Clostridiales_Incertae_Sedis_XII	Fusibacter		OTU239	0	1	0	32		4.82835e-05		Archaea	Euryarchaeota	Methanomicrobia	Methanomicrobiales	Methanoregulaceae	Methanoregula
OTU92	1	0	57	0		0.000128025		Bacteria	Firmicutes	Clostridia	Clostridiales	NA	NA		OTU215	1	0	78	0		2.61121e-08		Bacteria	Firmicutes	Clostridia	Clostridiales	Ruminococcaceae	Ruminococcus		OTU230	0	1	0	35		5.33664e-05		Bacteria	Firmicutes	Clostridia	Clostridiales	Ruminococcaceae	Intestinimonas
OTU109	1	0	37	0		0.000208582		Bacteria	Firmicutes	Clostridia	Clostridiales	Ruminococcaceae	Saccharofermentans		OTU189	1	0	70	0		5.55544e-08		Bacteria	Firmicutes	Clostridia	Clostridiales	Clostridiales_Incertae_Sedis_XI	Sedimentibacter		OTU50	0	1	0	46		6.01795e-05		Bacteria	Firmicutes	Clostridia	Clostridiales	Peptostreptococcaceae	Intestinibacter
OTU75	1	0	43	0		0.000393145		Bacteria	Firmicutes	Clostridia	Clostridiales	Ruminococcaceae	NA		OTU92	1	0	57	0		2.1595e-07		Bacteria	Firmicutes	Clostridia	Clostridiales	NA	NA		OTU95	0	1	0	36		7.72218e-05		Bacteria	Firmicutes	Clostridia	Clostridiales	Lachnospiraceae	Clostridium_XlVa
OTU94	1	0	104	0		0.000588592		Bacteria	Firmicutes	Clostridia	Clostridiales	Clostridiales_Incertae_Sedis_XIII	Anaerovorax		OTU191	1	0	82	0		2.17958e-07		Bacteria	Firmicutes	Clostridia	Clostridiales	Ruminococcaceae	NA		OTU108	0	1	0	45		9.52153e-05		Bacteria	Actinobacteria	Actinobacteria	Bifidobacteriales	Bifidobacteriaceae	Bifidobacterium
OTU140	1	0	72	0		0.000858478		Bacteria	NA	NA	NA	NA	NA		OTU229	1	0	46	0		4.37485e-06		Bacteria	Actinobacteria	Actinobacteria	Bifidobacteriales	Bifidobacteriaceae	Bifidobacterium		OTU140	0	1	0	21		0.000244731		Bacteria	NA	NA	NA	NA	NA
OTU120	1	0	151	0		0.00130936		Bacteria	Proteobacteria	Epsilonproteobacteria	Campylobacterales	Campylobacteraceae	Arcobacter		OTU253	1	0	38	0		1.26527e-05		Bacteria	Firmicutes	Clostridia	Clostridiales	Ruminococcaceae	NA		OTU143	0	1	0	25		0.000543679		Bacteria	Firmicutes	Clostridia	Clostridiales	NA	NA
OTU89	1	0	65	0		0.00180145		Bacteria	Proteobacteria	Deltaproteobacteria	Bdellovibrionales	Bdellovibrionaceae	Vampirovibrio		OTU193	1	0	63	0		1.92094e-05		Bacteria	Candidatus_Saccharibacteria	NA	NA	NA	NA		OTU312	0	1	0	20		0.0019875		Bacteria	Proteobacteria	Deltaproteobacteria	Desulfobacterales	Desulfobacteraceae	Desulfatiferula
OTU295	1	0	25	0		0.00193436		Bacteria	Candidatus_Saccharibacteria	NA	NA	NA	NA		OTU236	1	0	45	0		2.17429e-05		Bacteria	Candidatus_Saccharibacteria	NA	NA	NA	NA
OTU230	1	0	29	0		0.00227355		Bacteria	Firmicutes	Clostridia	Clostridiales	Ruminococcaceae	Intestinimonas		OTU124	1	0	49	0		3.4774e-05		Bacteria	Firmicutes	Clostridia	Clostridiales	Lachnospiraceae	Blautia
OTU88	1	0	44	0		0.00297752		Bacteria	Firmicutes	Clostridia	Clostridiales	Ruminococcaceae	NA		OTU349	1	0	29	0		5.08042e-05		Bacteria	Actinobacteria	Actinobacteria	Actinomycetales	Corynebacteriaceae	Corynebacterium
OTU229	1	0	46	0		0.00312167		Bacteria	Actinobacteria	Actinobacteria	Bifidobacteriales	Bifidobacteriaceae	Bifidobacterium		OTU295	1	0	25	0		5.3583e-05		Bacteria	Candidatus_Saccharibacteria	NA	NA	NA	NA
OTU253	1	0	38	0		0.00415271		Bacteria	Firmicutes	Clostridia	Clostridiales	Ruminococcaceae	NA		OTU240	1	0	53	0		6.30727e-05		Bacteria	Firmicutes	Clostridia	Clostridiales	NA	NA
OTU349	1	0	29	0		0.00586753		Bacteria	Actinobacteria	Actinobacteria	Actinomycetales	Corynebacteriaceae	Corynebacterium		OTU370	1	0	25	0		9.79353e-05		Bacteria	Firmicutes	Clostridia	Clostridiales	Lachnospiraceae	Dorea
OTU177	1	0	25	0		0.00626003		Bacteria	Firmicutes	Clostridia	Clostridiales	Christensenellaceae	Christensenella		OTU195	1	0	22	0		0.000123226		Bacteria	Candidatus_Saccharibacteria	NA	NA	NA	NA
OTU370	1	0	25	0		0.00626003		Bacteria	Firmicutes	Clostridia	Clostridiales	Lachnospiraceae	Dorea		OTU359	1	0	19	0		0.000153894		Bacteria	Firmicutes	Clostridia	Clostridiales	Christensenellaceae	Christensenella
OTU336	1	0	26	0		0.00749111		Bacteria	Fusobacteria	Fusobacteriia	Fusobacteriales	Fusobacteriaceae	NA		OTU325	1	0	31	0		0.00146918		Bacteria	Proteobacteria	Alphaproteobacteria	Rhodospirillales	Acetobacteraceae	NA
OTU181	1	0	61	0		0.00897649		Bacteria	Proteobacteria	Alphaproteobacteria	Rhodospirillales	Rhodospirillaceae	NA		OTU292	1	0	21	0		0.00157224		Bacteria	Firmicutes	Clostridia	Clostridiales	Christensenellaceae	Christensenella
OTU236	1	0	45	0		0.0254945		Bacteria	Candidatus_Saccharibacteria	NA	NA	NA	NA
OTU424	1	0	15	0		0.0466643		Bacteria	Fusobacteria	Fusobacteriia	Fusobacteriales	Fusobacteriaceae	NA		OTU40	0	1	0	149		7.01498e-13		Archaea	Euryarchaeota	Methanomicrobia	Methanomicrobiales	Methanospirillaceae	Methanospirillum
															OTU70	0	1	0	61		1.50525e-08		Bacteria	Synergistetes	Synergistia	Synergistales	Synergistaceae	Fretibacterium
OTU93	0	1	0	102		3.29315e-06		Bacteria	Synergistetes	Synergistia	Synergistales	Synergistaceae	Cloacibacillus		OTU108	0	1	0	45		2.70088e-08		Bacteria	Actinobacteria	Actinobacteria	Bifidobacteriales	Bifidobacteriaceae	Bifidobacterium
OTU62	0	1	0	102		8.19756e-06		Bacteria	Synergistetes	Synergistia	Synergistales	Synergistaceae	Cloacibacillus		OTU225	0	1	0	51		3.06098e-07		Bacteria	Proteobacteria	Alphaproteobacteria	Rhodospirillales	NA	NA
OTU204	0	1	0	30		0.0504557		Bacteria	Chloroflexi	Anaerolineae	Anaerolineales	Anaerolineaceae	Bellilinea		OTU114	0	1	0	54		4.76231e-07		Bacteria	Firmicutes	Clostridia	Clostridiales	Lachnospiraceae	Hespellia
															OTU239	0	1	0	32		5.46029e-06		Archaea	Euryarchaeota	Methanomicrobia	Methanomicrobiales	Methanoregulaceae	Methanoregula
															OTU143	0	1	0	25		9.41167e-06		Bacteria	Firmicutes	Clostridia	Clostridiales	NA	NA
															OTU312	0	1	0	20		2.92683e-05		Bacteria	Proteobacteria	Deltaproteobacteria	Desulfobacterales	Desulfobacteraceae	Desulfatiferula

## Sheet: #2 - Sig. diff. OTUs at 0 m
Significantly different OTUs between two lines at 0 meters
Untreated vs. Fe(II)															Untreated vs. Fe(III)				Fe(II) vs Fe(III)
	Prevalence		Counts
OTU number	Fe(II)	Untreated	Fe(II)	Untreated		p-value		Kingdom	Phylum	Class	Order	Family	Genus		No significantly different OTUs				No significantly different OTUs
OTU7	1	1	599	68		9.62999e-13		Archaea	Euryarchaeota	Thermoplasmata	Methanomassiliicoccales	Methanomassiliicoccaceae	Methanomassiliicoccus
OTU92	1	1	230	57		3.10358e-07		Bacteria	Firmicutes	Clostridia	Clostridiales	NA	NA
OTU5	1	1	178	933		2.63348e-06		Bacteria	Firmicutes	Negativicutes	Selenomonadales	Veillonellaceae	NA
OTU60	1	1	52	324		1.81728e-05		Bacteria	Fusobacteria	Fusobacteriia	Fusobacteriales	Leptotrichiaceae	Streptobacillus
OTU30	1	1	58	20		0.000108922		Bacteria	Firmicutes	NA	NA	NA	NA
OTU36	1	1	125	49		0.000119162		Bacteria	Synergistetes	Synergistia	Synergistales	Synergistaceae	Lactivibrio
OTU38	1	1	82	381		0.00017804		Bacteria	Firmicutes	Clostridia	Clostridiales	Peptostreptococcaceae	Proteocatella
OTU15	1	1	259	1102		0.000420653		Bacteria	Proteobacteria	Epsilonproteobacteria	Campylobacterales	Campylobacteraceae	Arcobacter
OTU48	1	1	153	96		0.00891582		Bacteria	Firmicutes	Clostridia	Clostridiales	Clostridiaceae_1	Clostridium_sensu_stricto
OTU14	1	1	542	320		0.00983958		Bacteria	Firmicutes	Clostridia	Clostridiales	Natranaerovirga	NA
OTU58	1	1	170	111		0.0117126		Bacteria	Firmicutes	Clostridia	Clostridiales	Clostridiaceae_1	Youngiibacter
OTU75	1	1	72	43		0.0126692		Bacteria	Firmicutes	Clostridia	Clostridiales	Ruminococcaceae	NA
OTU59	1	1	99	58		0.0163991		Bacteria	Firmicutes	Clostridia	Clostridiales	Ruminococcaceae	Clostridium_III
OTU25	1	1	276	207		0.0261034		Archaea	Euryarchaeota	Methanomicrobia	Methanosarcinales	Methanosarcinaceae	Methanomethylovorans
OTU54	1	0	318	0		4.77652e-19		Bacteria	Firmicutes	Clostridia	Clostridiales	Clostridiales_Incertae_Sedis_XI	Sedimentibacter
OTU65	1	0	178	0		1.04491e-16		Bacteria	Actinobacteria	Actinobacteria	Actinomycetales	Propionibacteriaceae	NA
OTU52	1	0	221	0		4.83964e-16		Bacteria	Firmicutes	Clostridia	Clostridiales	Lachnospiraceae	Clostridium_XlVa
OTU98	1	0	117	0		1.16667e-13		Bacteria	Proteobacteria	Deltaproteobacteria	Desulfobacterales	Desulfobacteraceae	Desulfobacter
OTU129	1	0	86	0		6.7149e-13		Bacteria	NA	NA	NA	NA	NA
OTU167	1	0	113	0		2.69561e-12		Bacteria	Firmicutes	Clostridia	Clostridiales	Ruminococcaceae	Anaerofilum
OTU77	1	0	88	0		3.84836e-11		Bacteria	Firmicutes	Clostridia	Clostridiales	Clostridiales_Incertae_Sedis_XIII	Anaerovorax
OTU241	1	0	59	0		1.28644e-10		Bacteria	Firmicutes	Clostridia	Clostridiales	Clostridiales_Incertae_Sedis_XIII	Anaerovorax
OTU158	1	0	37	0		5.37255e-08		Bacteria	Proteobacteria	Alphaproteobacteria	NA	NA	NA
OTU108	1	0	38	0		1.42668e-07		Bacteria	Actinobacteria	Actinobacteria	Bifidobacteriales	Bifidobacteriaceae	Bifidobacterium
OTU342	1	0	30	0		2.61516e-07		Bacteria	Firmicutes	Clostridia	Clostridiales	Natranaerovirga	NA
OTU451	1	0	16	0		4.59552e-06		Bacteria	Chloroflexi	Anaerolineae	Anaerolineales	Anaerolineaceae	Ornatilinea
OTU287	1	0	17	0		1.01094e-05		Bacteria	Actinobacteria	Actinobacteria	Bifidobacteriales	Bifidobacteriaceae	Bifidobacterium
OTU80	0	1	0	375		1.00818e-17		Bacteria	Firmicutes	Clostridia	Clostridiales	Clostridiales_Incertae_Sedis_XII	Fusibacter
OTU55	0	1	0	244		4.10337e-16		Bacteria	Firmicutes	Clostridia	Clostridiales	Clostridiales_Incertae_Sedis_XII	Fusibacter
OTU79	0	1	0	255		1.16664e-14		Bacteria	Firmicutes	Clostridia	Clostridiales	Clostridiales_Incertae_Sedis_XII	Fusibacter
OTU101	0	1	0	226		1.61576e-12		Bacteria	Firmicutes	Clostridia	Clostridiales	Lachnospiraceae	Clostridium_XlVa
OTU64	0	1	0	178		6.15731e-12		Bacteria	Firmicutes	Clostridia	Clostridiales	Peptostreptococcaceae	Acetoanaerobium
OTU99	0	1	0	176		1.16713e-11		Bacteria	Firmicutes	Clostridia	Clostridiales	Clostridiales_Incertae_Sedis_XII	Fusibacter
OTU120	0	1	0	151		2.2786e-10		Bacteria	Proteobacteria	Epsilonproteobacteria	Campylobacterales	Campylobacteraceae	Arcobacter
OTU159	0	1	0	74		9.88407e-10		Bacteria	Firmicutes	Negativicutes	Selenomonadales	Veillonellaceae	NA
OTU138	0	1	0	67		1.05247e-09		Bacteria	Firmicutes	Clostridia	Clostridiales	Lachnospiraceae	Roseburia
OTU141	0	1	0	62		1.99456e-09		Bacteria	Firmicutes	Clostridia	Clostridiales	Lachnospiraceae	Clostridium_XlVa
OTU215	0	1	0	78		3.73101e-09		Bacteria	Firmicutes	Clostridia	Clostridiales	Ruminococcaceae	Ruminococcus
OTU227	0	1	0	55		9.13775e-09		Bacteria	Firmicutes	Clostridia	Clostridiales	Ruminococcaceae	Acetanaerobacterium
OTU140	0	1	0	72		1.71608e-08		Bacteria	NA	NA	NA	NA	NA
OTU78	0	1	0	49		3.3218e-08		Bacteria	Elusimicrobia	Endomicrobia	Candidatus_Endomicrobium	NA	NA
OTU191	0	1	0	82		4.80146e-08		Bacteria	Firmicutes	Clostridia	Clostridiales	Ruminococcaceae	NA
OTU222	0	1	0	48		5.73953e-08		Bacteria	Firmicutes	Clostridia	Clostridiales	Natranaerovirga	NA
OTU229	0	1	0	46		5.03184e-07		Bacteria	Actinobacteria	Actinobacteria	Bifidobacteriales	Bifidobacteriaceae	Bifidobacterium
OTU181	0	1	0	61		6.51706e-07		Bacteria	Proteobacteria	Alphaproteobacteria	Rhodospirillales	Rhodospirillaceae	NA
OTU88	0	1	0	44		8.90918e-07		Bacteria	Firmicutes	Clostridia	Clostridiales	Ruminococcaceae	NA
OTU230	0	1	0	29		4.21083e-06		Bacteria	Firmicutes	Clostridia	Clostridiales	Ruminococcaceae	Intestinimonas
OTU163	0	1	0	30		5.71753e-06		Bacteria	Firmicutes	Clostridia	Clostridiales	Clostridiales_Incertae_Sedis_XII	Fusibacter
OTU349	0	1	0	29		7.71176e-06		Bacteria	Actinobacteria	Actinobacteria	Actinomycetales	Corynebacteriaceae	Corynebacterium
OTU193	0	1	0	63		8.16449e-06		Bacteria	Candidatus_Saccharibacteria	NA	NA	NA	NA
OTU236	0	1	0	45		8.35793e-06		Bacteria	Candidatus_Saccharibacteria	NA	NA	NA	NA
OTU336	0	1	0	26		1.40709e-05		Bacteria	Fusobacteria	Fusobacteriia	Fusobacteriales	Fusobacteriaceae	NA
OTU177	0	1	0	25		1.46886e-05		Bacteria	Firmicutes	Clostridia	Clostridiales	Christensenellaceae	Christensenella
OTU370	0	1	0	25		1.46886e-05		Bacteria	Firmicutes	Clostridia	Clostridiales	Lachnospiraceae	Dorea
OTU240	0	1	0	53		2.80555e-05		Bacteria	Firmicutes	Clostridia	Clostridiales	NA	NA
OTU359	0	1	0	19		4.12531e-05		Bacteria	Firmicutes	Clostridia	Clostridiales	Christensenellaceae	Christensenella
OTU271	0	1	0	37		5.04041e-05		Bacteria	NA	NA	NA	NA	NA
OTU46	0	1	0	21		9.24578e-05		Archaea	Euryarchaeota	Methanomicrobia	Methanomicrobiales	Methanospirillaceae	Methanospirillum
OTU190	0	1	0	28		0.000142859		Bacteria	Elusimicrobia	Elusimicrobia	Elusimicrobiales	Elusimicrobiaceae	Elusimicrobium
OTU340	0	1	0	24		0.000213901		Bacteria	Firmicutes	Clostridia	Clostridiales	Lachnospiraceae	NA
OTU325	0	1	0	31		0.0007787		Bacteria	Proteobacteria	Alphaproteobacteria	Rhodospirillales	Acetobacteraceae	NA
OTU424	0	1	0	15		0.00101921		Bacteria	Fusobacteria	Fusobacteriia	Fusobacteriales	Fusobacteriaceae	NA
OTU296	0	1	0	24		0.00325661		Bacteria	Firmicutes	Clostridia	Clostridiales	NA	NA
OTU350	0	1	0	26		0.0032606		Bacteria	Candidatus_Saccharibacteria	NA	NA	NA	NA

## Sheet: #3 - Sig. diff. OTUs at 100 m
Significantly different OTUs between two lines at 100 meters
Untreated vs. Fe(II)															Untreated vs. Fe(III)															Fe(II) vs Fe(III)
	Prevalence		Counts													Prevalence		Counts													Prevalence		Counts
OTU number	Fe(II)	Untreated	Fe(II)	Untreated		p-value		Kingdom	Phylum	Class	Order	Family	Genus		OTU number	Fe(III)	Untreated	Fe(III)	Untreated		p-value		Kingdom	Phylum	Class	Order	Family	Genus		OTU number	Fe(II)	Fe(III)	Fe(II)	Fe(III)		p-value		Kingdom	Phylum	Class	Order	Family	Genus
OTU14	1	1	565	22		1.82604e-13		Bacteria	Firmicutes	Clostridia	Clostridiales	Natranaerovirga	NA		OTU18	1	1	185	37		3.69771e-06		Bacteria	Firmicutes	Clostridia	Clostridiales	Peptostreptococcaceae	Romboutsia		OTU11	1	1	683	62		8.86634e-05		Bacteria	Firmicutes	Clostridia	Clostridiales	Ruminococcaceae	Saccharofermentans
OTU11	1	1	683	89		1.03501e-09		Bacteria	Firmicutes	Clostridia	Clostridiales	Ruminococcaceae	Saccharofermentans		OTU30	1	1	117	44		2.73332e-05		Bacteria	Firmicutes	NA	NA	NA	NA		OTU26	1	1	315	33		0.000163325		Bacteria	Proteobacteria	Epsilonproteobacteria	Campylobacterales	Campylobacteraceae	Sulfurospirillum
OTU26	1	1	315	43		7.91443e-09		Bacteria	Proteobacteria	Epsilonproteobacteria	Campylobacterales	Campylobacteraceae	Sulfurospirillum		OTU28	1	1	251	134		0.00140965		Bacteria	Synergistetes	Synergistia	Synergistales	Synergistaceae	Aminomonas		OTU19	1	1	21	92		0.000537521		Bacteria	Firmicutes	Clostridia	NA	NA	NA
OTU19	1	1	21	247		2.75028e-08		Bacteria	Firmicutes	Clostridia	NA	NA	NA		OTU64	1	1	10	43		0.00187687		Bacteria	Firmicutes	Clostridia	Clostridiales	Peptostreptococcaceae	Acetoanaerobium		OTU38	1	1	103	25		0.00199954		Bacteria	Firmicutes	Clostridia	Clostridiales	Peptostreptococcaceae	Proteocatella
OTU47	1	1	143	47		9.4614e-06		Bacteria	Firmicutes	Clostridia	Clostridiales	Clostridiales_Incertae_Sedis_XII	Fusibacter		OTU85	1	1	59	33		0.00242645		Bacteria	Synergistetes	Synergistia	Synergistales	Synergistaceae	Cloacibacillus		OTU15	1	1	357	78		0.00327358		Bacteria	Proteobacteria	Epsilonproteobacteria	Campylobacterales	Campylobacteraceae	Arcobacter
OTU15	1	1	357	115		1.62808e-05		Bacteria	Proteobacteria	Epsilonproteobacteria	Campylobacterales	Campylobacteraceae	Arcobacter		OTU91	1	1	42	15		0.00247917		Bacteria	Actinobacteria	Actinobacteria	Coriobacteriales	Coriobacteriaceae	Gordonibacter		OTU6	1	1	425	102		0.00365838		Bacteria	Firmicutes	Clostridia	Clostridiales	Clostridiales_Incertae_Sedis_XIII	Anaerovorax
OTU1	1	1	228	1767		0.000315055		Bacteria	Synergistetes	Synergistia	Synergistales	Synergistaceae	Cloacibacillus		OTU24	1	1	47	218		0.00287012		Bacteria	Firmicutes	Clostridia	Clostridiales	Clostridiales_Incertae_Sedis_XIII	Anaerovorax		OTU1	1	1	228	853		0.0053145		Bacteria	Synergistetes	Synergistia	Synergistales	Synergistaceae	Cloacibacillus
OTU10	1	1	799	290		0.000794677		Bacteria	Firmicutes	Clostridia	Clostridiales	Clostridiales_Incertae_Sedis_XI	Tissierella		OTU6	1	1	102	572		0.00653425		Bacteria	Firmicutes	Clostridia	Clostridiales	Clostridiales_Incertae_Sedis_XIII	Anaerovorax		OTU30	1	1	61	117		0.0364242		Bacteria	Firmicutes	NA	NA	NA	NA
OTU2	1	1	257	1498		0.00220464		Bacteria	Synergistetes	Synergistia	Synergistales	Synergistaceae	Cloacibacillus		OTU35	1	1	275	182		0.00878044		Bacteria	Chloroflexi	Anaerolineae	Anaerolineales	Anaerolineaceae	Levilinea		OTU24	1	1	102	47		0.0470719		Bacteria	Firmicutes	Clostridia	Clostridiales	Clostridiales_Incertae_Sedis_XIII	Anaerovorax
OTU5	1	1	159	750		0.00426772		Bacteria	Firmicutes	Negativicutes	Selenomonadales	Veillonellaceae	NA		OTU36	1	1	90	59		0.0292572		Bacteria	Synergistetes	Synergistia	Synergistales	Synergistaceae	Lactivibrio
OTU38	1	1	103	78		0.00606197		Bacteria	Firmicutes	Clostridia	Clostridiales	Peptostreptococcaceae	Proteocatella		OTU20	1	1	127	114		0.0353337		Bacteria	Firmicutes	Clostridia	Clostridiales	Clostridiaceae_1	Youngiibacter		OTU10	1	0	799	0		2.15261e-06		Bacteria	Firmicutes	Clostridia	Clostridiales	Clostridiales_Incertae_Sedis_XI	Tissierella
OTU3	1	1	350	1113		0.034816		Bacteria	Synergistetes	Synergistia	Synergistales	Synergistaceae	Cloacibacillus		OTU17	1	1	78	211		0.0468828		Bacteria	Firmicutes	Clostridia	Clostridiales	NA	NA		OTU14	1	0	565	0		2.99042e-06		Bacteria	Firmicutes	Clostridia	Clostridiales	Natranaerovirga	NA
																														OTU54	1	0	416	0		4.16959e-06		Bacteria	Firmicutes	Clostridia	Clostridiales	Clostridiales_Incertae_Sedis_XI	Sedimentibacter
OTU54	1	0	416	0		2.23798e-14		Bacteria	Firmicutes	Clostridia	Clostridiales	Clostridiales_Incertae_Sedis_XI	Sedimentibacter		OTU117	1	0	185	0		4.50819e-09		Bacteria	Synergistetes	Synergistia	Synergistales	Synergistaceae	Cloacibacillus		OTU47	1	0	143	0		2.25637e-05		Bacteria	Firmicutes	Clostridia	Clostridiales	Clostridiales_Incertae_Sedis_XII	Fusibacter
OTU31	1	0	241	0		9.70528e-12		Bacteria	Firmicutes	Clostridia	Clostridiales	Clostridiales_Incertae_Sedis_XIII	Anaerovorax		OTU31	1	0	184	0		5.55151e-09		Bacteria	Firmicutes	Clostridia	Clostridiales	Clostridiales_Incertae_Sedis_XIII	Anaerovorax		OTU5	1	0	159	0		2.78503e-05		Bacteria	Firmicutes	Negativicutes	Selenomonadales	Veillonellaceae	NA
OTU52	1	0	99	0		3.61192e-09		Bacteria	Firmicutes	Clostridia	Clostridiales	Lachnospiraceae	Clostridium_XlVa		OTU82	1	0	127	0		4.90856e-08		Archaea	Euryarchaeota	Thermoplasmata	Methanomassiliicoccales	Methanomassiliicoccaceae	Methanomassiliicoccus		OTU61	1	0	136	0		3.21133e-05		Bacteria	Firmicutes	Clostridia	Clostridiales	Clostridiales_Incertae_Sedis_XII	Fusibacter
OTU129	1	0	73	0		4.23409e-09		Bacteria	NA	NA	NA	NA	NA		OTU153	1	0	100	0		1.43914e-07		Bacteria	Candidatus_Saccharibacteria	NA	NA	NA	NA		OTU98	1	0	118	0		4.6536e-05		Bacteria	Proteobacteria	Deltaproteobacteria	Desulfobacterales	Desulfobacteraceae	Desulfobacter
OTU98	1	0	118	0		6.94074e-09		Bacteria	Proteobacteria	Deltaproteobacteria	Desulfobacterales	Desulfobacteraceae	Desulfobacter		OTU84	1	0	72	0		2.33486e-07		Bacteria	Proteobacteria	Alphaproteobacteria	Rhodospirillales	Rhodospirillaceae	NA		OTU129	1	0	73	0		0.000107929		Bacteria	NA	NA	NA	NA	NA
OTU89	1	0	70	0		1.06139e-08		Bacteria	Proteobacteria	Deltaproteobacteria	Bdellovibrionales	Bdellovibrionaceae	Vampirovibrio		OTU44	1	0	80	0		3.16552e-07		Bacteria	Firmicutes	Clostridia	Clostridiales	Clostridiaceae_1	Clostridium_sensu_stricto		OTU25	1	0	42	0		0.000217252		Archaea	Euryarchaeota	Methanomicrobia	Methanosarcinales	Methanosarcinaceae	Methanomethylovorans
OTU75	1	0	53	0		1.79253e-08		Bacteria	Firmicutes	Clostridia	Clostridiales	Ruminococcaceae	NA		OTU65	1	0	74	0		7.34332e-07		Bacteria	Actinobacteria	Actinobacteria	Actinomycetales	Propionibacteriaceae	NA		OTU158	1	0	45	0		0.000285554		Bacteria	Proteobacteria	Alphaproteobacteria	NA	NA	NA
OTU158	1	0	45	0		7.07729e-08		Bacteria	Proteobacteria	Alphaproteobacteria	NA	NA	NA		OTU95	1	0	51	0		7.49175e-07		Bacteria	Firmicutes	Clostridia	Clostridiales	Lachnospiraceae	Clostridium_XlVa		OTU183	1	0	40	0		0.000517222		Bacteria	Firmicutes	Clostridia	Clostridiales	Ruminococcaceae	Gemmiger
OTU183	1	0	40	0		6.01528e-07		Bacteria	Firmicutes	Clostridia	Clostridiales	Ruminococcaceae	Gemmiger		OTU50	1	0	48	0		1.82976e-06		Bacteria	Firmicutes	Clostridia	Clostridiales	Peptostreptococcaceae	Intestinibacter		OTU60	1	0	37	0		0.000640817		Bacteria	Fusobacteria	Fusobacteriia	Fusobacteriales	Leptotrichiaceae	Streptobacillus
OTU247	1	0	18	0		2.30448e-06		Bacteria	NA	NA	NA	NA	NA		OTU173	1	0	51	0		3.76502e-06		Bacteria	Proteobacteria	Deltaproteobacteria	Desulfobacterales	Desulfobulbaceae	Desulfobulbus		OTU63	1	0	25	0		0.00112812		Bacteria	Firmicutes	Clostridia	Clostridiales	Lachnospiraceae	NA
															OTU199	1	0	33	0		5.83845e-06		Bacteria	Firmicutes	Clostridia	Clostridiales	Ruminococcaceae	NA		OTU247	1	0	18	0		0.00152751		Bacteria	NA	NA	NA	NA	NA
OTU35	0	1	0	182		2.3734e-09		Bacteria	Chloroflexi	Anaerolineae	Anaerolineales	Anaerolineaceae	Levilinea		OTU205	1	0	35	0		7.27645e-06		Bacteria	Firmicutes	Clostridia	Clostridiales	Lachnospiraceae	Clostridium_XlVa
OTU42	0	1	0	177		9.26547e-09		Bacteria	Chloroflexi	Anaerolineae	Anaerolineales	Anaerolineaceae	NA		OTU362	1	0	27	0		9.36672e-06		Bacteria	Firmicutes	Clostridia	Clostridiales	Ruminococcaceae	NA		OTU35	0	1	0	275		8.15378e-06		Bacteria	Chloroflexi	Anaerolineae	Anaerolineales	Anaerolineaceae	Levilinea
OTU53	0	1	0	202		1.16922e-08		Bacteria	Chloroflexi	Anaerolineae	Anaerolineales	Anaerolineaceae	Levilinea		OTU282	1	0	40	0		1.17616e-05		Archaea	Euryarchaeota	Thermoplasmata	Methanomassiliicoccales	Methanomassiliicoccaceae	Methanomassiliicoccus		OTU117	0	1	0	185		1.5977e-05		Bacteria	Synergistetes	Synergistia	Synergistales	Synergistaceae	Cloacibacillus
OTU71	0	1	0	95		3.80273e-08		Bacteria	Firmicutes	Bacilli	Lactobacillales	Carnobacteriaceae	Trichococcus		OTU170	1	0	39	0		1.53631e-05		Bacteria	Proteobacteria	Alphaproteobacteria	Rhizobiales	Methylocystaceae	Pleomorphomonas		OTU82	0	1	0	127		2.96932e-05		Archaea	Euryarchaeota	Thermoplasmata	Methanomassiliicoccales	Methanomassiliicoccaceae	Methanomassiliicoccus
OTU66	0	1	0	96		4.99498e-08		Bacteria	Synergistetes	Synergistia	Synergistales	Synergistaceae	Aminivibrio		OTU258	1	0	26	0		1.56985e-05		Bacteria	Proteobacteria	Deltaproteobacteria	Bdellovibrionales	Bdellovibrionaceae	Vampirovibrio		OTU42	0	1	0	112		3.99615e-05		Bacteria	Chloroflexi	Anaerolineae	Anaerolineales	Anaerolineaceae	NA
OTU55	0	1	0	144		1.06292e-07		Bacteria	Firmicutes	Clostridia	Clostridiales	Clostridiales_Incertae_Sedis_XII	Fusibacter		OTU182	1	0	26	0		2.08137e-05		Bacteria	Firmicutes	Clostridia	Clostridiales	Christensenellaceae	Christensenella		OTU153	0	1	0	100		4.69949e-05		Bacteria	Candidatus_Saccharibacteria	NA	NA	NA	NA
OTU56	0	1	0	68		3.84186e-07		Archaea	Euryarchaeota	Thermoplasmata	Methanomassiliicoccales	Methanomassiliicoccaceae	Methanomassiliicoccus		OTU355	1	0	28	0		3.8763e-05		Bacteria	Firmicutes	Clostridia	Clostridiales	Ruminococcaceae	NA		OTU56	0	1	0	98		4.93348e-05		Archaea	Euryarchaeota	Thermoplasmata	Methanomassiliicoccales	Methanomassiliicoccaceae	Methanomassiliicoccus
OTU93	0	1	0	102		7.15473e-07		Bacteria	Synergistetes	Synergistia	Synergistales	Synergistaceae	Cloacibacillus		OTU75	1	0	23	0		3.91714e-05		Bacteria	Firmicutes	Clostridia	Clostridiales	Ruminococcaceae	NA		OTU44	0	1	0	80		7.35176e-05		Bacteria	Firmicutes	Clostridia	Clostridiales	Clostridiaceae_1	Clostridium_sensu_stricto
OTU46	0	1	0	75		7.35777e-07		Archaea	Euryarchaeota	Methanomicrobia	Methanomicrobiales	Methanospirillaceae	Methanospirillum		OTU88	1	0	23	0		0.000122394		Bacteria	Firmicutes	Clostridia	Clostridiales	Ruminococcaceae	NA		OTU84	0	1	0	72		9.63514e-05		Bacteria	Proteobacteria	Alphaproteobacteria	Rhodospirillales	Rhodospirillaceae	NA
OTU62	0	1	0	102		7.83746e-07		Bacteria	Synergistetes	Synergistia	Synergistales	Synergistaceae	Cloacibacillus		OTU330	1	0	19	0		0.00012356		Bacteria	Proteobacteria	Alphaproteobacteria	Rhodospirillales	Rhodospirillaceae	NA		OTU37	0	1	0	66		0.000126455		Bacteria	Firmicutes	Clostridia	Clostridiales	NA	NA
OTU37	0	1	0	95		8.64842e-07		Bacteria	Firmicutes	Clostridia	Clostridiales	NA	NA		OTU148	1	0	16	0		0.000124808		Bacteria	Firmicutes	Clostridia	Clostridiales	Ruminococcaceae	NA		OTU43	0	1	0	53		0.000174435		Bacteria	Firmicutes	Clostridia	Clostridiales	NA	NA
OTU87	0	1	0	54		1.65098e-06		Bacteria	Synergistetes	Synergistia	Synergistales	Synergistaceae	Cloacibacillus		OTU347	1	0	14	0		0.00106249		Archaea	Euryarchaeota	Methanomicrobia	Methanosarcinales	Methanosarcinaceae	Methanomethylovorans		OTU173	0	1	0	51		0.000190473		Bacteria	Proteobacteria	Deltaproteobacteria	Desulfobacterales	Desulfobulbaceae	Desulfobulbus
OTU107	0	1	0	59		2.0584e-06		Bacteria	Firmicutes	Clostridia	Clostridiales	Clostridiales_Incertae_Sedis_XIII	Anaerovorax																	OTU95	0	1	0	51		0.000212329		Bacteria	Firmicutes	Clostridia	Clostridiales	Lachnospiraceae	Clostridium_XlVa
OTU204	0	1	0	30		6.38934e-05		Bacteria	Chloroflexi	Anaerolineae	Anaerolineales	Anaerolineaceae	Bellilinea		OTU5	0	1	0	750		6.34251e-08		Bacteria	Firmicutes	Negativicutes	Selenomonadales	Veillonellaceae	NA		OTU122	0	1	0	42		0.00029298		Bacteria	Firmicutes	Clostridia	Clostridiales	Ruminococcaceae	NA
OTU86	0	1	0	34		0.00033582		Bacteria	Firmicutes	Clostridia	Clostridiales	Ruminococcaceae	Sporobacter		OTU53	0	1	0	202		6.38814e-08		Bacteria	Chloroflexi	Anaerolineae	Anaerolineales	Anaerolineaceae	Levilinea		OTU91	0	1	0	42		0.000326112		Bacteria	Actinobacteria	Actinobacteria	Coriobacteriales	Coriobacteriaceae	Gordonibacter
OTU78	0	1	0	49		0.00121584		Bacteria	Elusimicrobia	Endomicrobia	Candidatus_Endomicrobium	NA	NA		OTU29	0	1	0	231		1.33803e-07		Bacteria	Firmicutes	Negativicutes	Selenomonadales	Veillonellaceae	NA		OTU282	0	1	0	40		0.000327402		Archaea	Euryarchaeota	Thermoplasmata	Methanomassiliicoccales	Methanomassiliicoccaceae	Methanomassiliicoccus
OTU142	0	1	0	30		0.00322212		Bacteria	Firmicutes	Clostridia	Clostridiales	Clostridiales_Incertae_Sedis_XI	Sedimentibacter		OTU25	0	1	0	102		2.96717e-07		Archaea	Euryarchaeota	Methanomicrobia	Methanosarcinales	Methanosarcinaceae	Methanomethylovorans		OTU170	0	1	0	39		0.000348871		Bacteria	Proteobacteria	Alphaproteobacteria	Rhizobiales	Methylocystaceae	Pleomorphomonas
															OTU71	0	1	0	95		4.28592e-07		Bacteria	Firmicutes	Bacilli	Lactobacillales	Carnobacteriaceae	Trichococcus		OTU97	0	1	0	37		0.00041789		Archaea	Euryarchaeota	Thermoplasmata	Methanomassiliicoccales	Methanomassiliicoccaceae	Methanomassiliicoccus
															OTU58	0	1	0	118		5.60843e-07		Bacteria	Firmicutes	Clostridia	Clostridiales	Clostridiaceae_1	Youngiibacter		OTU205	0	1	0	35		0.000452684		Bacteria	Firmicutes	Clostridia	Clostridiales	Lachnospiraceae	Clostridium_XlVa
															OTU10	0	1	0	290		1.04816e-06		Bacteria	Firmicutes	Clostridia	Clostridiales	Clostridiales_Incertae_Sedis_XI	Tissierella		OTU199	0	1	0	33		0.00055201		Bacteria	Firmicutes	Clostridia	Clostridiales	Ruminococcaceae	NA
															OTU93	0	1	0	102		1.76725e-06		Bacteria	Synergistetes	Synergistia	Synergistales	Synergistaceae	Cloacibacillus		OTU355	0	1	0	28		0.000741955		Bacteria	Firmicutes	Clostridia	Clostridiales	Ruminococcaceae	NA
															OTU46	0	1	0	75		1.90151e-06		Archaea	Euryarchaeota	Methanomicrobia	Methanomicrobiales	Methanospirillaceae	Methanospirillum		OTU182	0	1	0	26		0.000936327		Bacteria	Firmicutes	Clostridia	Clostridiales	Christensenellaceae	Christensenella
															OTU107	0	1	0	59		4.47556e-06		Bacteria	Firmicutes	Clostridia	Clostridiales	Clostridiales_Incertae_Sedis_XIII	Anaerovorax		OTU362	0	1	0	27		0.000978315		Bacteria	Firmicutes	Clostridia	Clostridiales	Ruminococcaceae	NA
															OTU59	0	1	0	78		5.44935e-06		Bacteria	Firmicutes	Clostridia	Clostridiales	Ruminococcaceae	Clostridium_III		OTU86	0	1	0	23		0.00130524		Bacteria	Firmicutes	Clostridia	Clostridiales	Ruminococcaceae	Sporobacter
															OTU73	0	1	0	48		2.95829e-05		Bacteria	Acidobacteria	Acidobacteria_Gp3	Paludibaculum	NA	NA		OTU87	0	1	0	28		0.00150215		Bacteria	Synergistetes	Synergistia	Synergistales	Synergistaceae	Cloacibacillus
															OTU72	0	1	0	26		5.63117e-05		Bacteria	Firmicutes	Clostridia	Clostridiales	NA	NA		OTU330	0	1	0	19		0.00192259		Bacteria	Proteobacteria	Alphaproteobacteria	Rhodospirillales	Rhodospirillaceae	NA
															OTU204	0	1	0	30		7.17989e-05		Bacteria	Chloroflexi	Anaerolineae	Anaerolineales	Anaerolineaceae	Bellilinea		OTU148	0	1	0	16		0.00324666		Bacteria	Firmicutes	Clostridia	Clostridiales	Ruminococcaceae	NA
															OTU14	0	1	0	22		0.000110119		Bacteria	Firmicutes	Clostridia	Clostridiales	Natranaerovirga	NA		OTU347	0	1	0	14		0.00403292		Archaea	Euryarchaeota	Methanomicrobia	Methanosarcinales	Methanosarcinaceae	Methanomethylovorans
															OTU74	0	1	0	26		0.000126356		Bacteria	Firmicutes	Clostridia	Clostridiales	Ruminococcaceae	NA
															OTU47	0	1	0	47		0.000128145		Bacteria	Firmicutes	Clostridia	Clostridiales	Clostridiales_Incertae_Sedis_XII	Fusibacter
															OTU78	0	1	0	49		0.000161411		Bacteria	Elusimicrobia	Endomicrobia	Candidatus_Endomicrobium	NA	NA

## Sheet: #4 - Sig. diff. OTUs at 200 m
Significantly different OTUs between two lines at 100 meters
Untreated vs. Fe(II)															Untreated vs. Fe(III)															Fe(II) vs Fe(III)
	Prevalence		Counts													Prevalence		Counts													Prevalence		Counts
OTU number	Fe(II)	Untreated	Fe(II)	Untreated		p-value		Kingdom	Phylum	Class	Order	Family	Genus		OTU number	Fe(III)	Untreated	Fe(III)	Untreated		p-value		Kingdom	Phylum	Class	Order	Family	Genus		OTU number	Fe(II)	Fe(III)	Fe(II)	Fe(III)		p-value		Kingdom	Phylum	Class	Order	Family	Genus
OTU23	1	1	1051	161		2.20737e-07		Bacteria	Fusobacteria	Fusobacteriia	Fusobacteriales	Fusobacteriaceae	Propionigenium		OTU5	1	1	51	1427		3.67101e-09		Bacteria	Firmicutes	Negativicutes	Selenomonadales	Veillonellaceae	NA		OTU23	1	1	1051	145		0.00775538		Bacteria	Fusobacteria	Fusobacteriia	Fusobacteriales	Fusobacteriaceae	Propionigenium
OTU27	1	1	17	203		2.90615e-05		Bacteria	Synergistetes	Synergistia	Synergistales	Synergistaceae	Fretibacterium		OTU7	1	1	222	55		7.70323e-05		Archaea	Euryarchaeota	Thermoplasmata	Methanomassiliicoccales	Methanomassiliicoccaceae	Methanomassiliicoccus		OTU14	1	1	1297	203		0.0155431		Bacteria	Firmicutes	Clostridia	Clostridiales	Natranaerovirga	NA
OTU13	1	1	49	911		0.000621338		Bacteria	Firmicutes	Clostridia	Clostridiales	Ruminococcaceae	NA		OTU13	1	1	176	911		0.000191351		Bacteria	Firmicutes	Clostridia	Clostridiales	Ruminococcaceae	NA		OTU15	1	1	204	78		0.0423966		Bacteria	Proteobacteria	Epsilonproteobacteria	Campylobacterales	Campylobacteraceae	Arcobacter
OTU15	1	1	204	121		0.0154505		Bacteria	Proteobacteria	Epsilonproteobacteria	Campylobacterales	Campylobacteraceae	Arcobacter		OTU40	1	1	37	149		0.000587835		Archaea	Euryarchaeota	Methanomicrobia	Methanomicrobiales	Methanospirillaceae	Methanospirillum		OTU52	1	1	256	71		0.0431217		Bacteria	Firmicutes	Clostridia	Clostridiales	Lachnospiraceae	Clostridium_XlVa
OTU26	1	1	186	163		0.0200594		Bacteria	Proteobacteria	Epsilonproteobacteria	Campylobacterales	Campylobacteraceae	Sulfurospirillum		OTU49	1	1	67	247		0.000995472		Bacteria	Firmicutes	Clostridia	Clostridiales	Ruminococcaceae	Anaerofilum
OTU48	1	1	221	58		0.0423959		Bacteria	Firmicutes	Clostridia	Clostridiales	Clostridiaceae_1	Clostridium_sensu_stricto		OTU20	1	1	100	373		0.00116161		Bacteria	Firmicutes	Clostridia	Clostridiales	Clostridiaceae_1	Youngiibacter		OTU160	1	0	56	0		0.0209793		Bacteria	Proteobacteria	Alphaproteobacteria	Rhodospirillales	NA	NA
															OTU26	1	1	415	163		0.00265333		Bacteria	Proteobacteria	Epsilonproteobacteria	Campylobacterales	Campylobacteraceae	Sulfurospirillum		OTU141	1	0	62	0		0.0219986		Bacteria	Firmicutes	Clostridia	Clostridiales	Lachnospiraceae	Clostridium_XlVa
OTU160	1	0	56	0		1.20212e-05		Bacteria	Proteobacteria	Alphaproteobacteria	Rhodospirillales	NA	NA		OTU8	1	1	131	465		0.00278181		Bacteria	Synergistetes	Synergistia	Synergistales	Synergistaceae	Aminomonas		OTU61	1	0	54	0		0.0244011		Bacteria	Firmicutes	Clostridia	Clostridiales	Clostridiales_Incertae_Sedis_XII	Fusibacter
OTU290	1	0	42	0		0.000161829		Bacteria	Proteobacteria	Deltaproteobacteria	Desulfobacterales	Desulfobacteraceae	Desulfobacter		OTU36	1	1	203	90		0.00439677		Bacteria	Synergistetes	Synergistia	Synergistales	Synergistaceae	Lactivibrio		OTU290	1	0	42	0		0.0319017		Bacteria	Proteobacteria	Deltaproteobacteria	Desulfobacterales	Desulfobacteraceae	Desulfobacter
OTU158	1	0	29	0		0.00161728		Bacteria	Proteobacteria	Alphaproteobacteria	NA	NA	NA		OTU27	1	1	68	203		0.00926249		Bacteria	Synergistetes	Synergistia	Synergistales	Synergistaceae	Fretibacterium
															OTU63	1	1	43	117		0.0106605		Bacteria	Firmicutes	Clostridia	Clostridiales	Lachnospiraceae	NA		OTU33	0	1	0	197		0.00732437		Bacteria	Firmicutes	Clostridia	Clostridiales	NA	NA
OTU55	0	1	0	228		3.81768e-07		Bacteria	Firmicutes	Clostridia	Clostridiales	Clostridiales_Incertae_Sedis_XII	Fusibacter		OTU21	1	1	291	152		0.0114393		Archaea	Euryarchaeota	Thermoplasmata	Methanomassiliicoccales	Methanomassiliicoccaceae	Methanomassiliicoccus		OTU39	0	1	0	148		0.01027		Bacteria	Synergistetes	Synergistia	Synergistales	Synergistaceae	Fretibacterium
OTU29	0	1	0	194		3.50062e-06		Bacteria	Firmicutes	Negativicutes	Selenomonadales	Veillonellaceae	NA		OTU6	1	1	432	247		0.0200648		Bacteria	Firmicutes	Clostridia	Clostridiales	Clostridiales_Incertae_Sedis_XIII	Anaerovorax		OTU245	0	1	0	35		0.0156004		Bacteria	Firmicutes	Clostridia	Clostridiales	NA	NA
OTU51	0	1	0	205		4.00847e-06		Bacteria	Firmicutes	Bacilli	Lactobacillales	Carnobacteriaceae	NA		OTU73	1	1	71	35		0.0266632		Bacteria	Acidobacteria	Acidobacteria_Gp3	Paludibaculum	NA	NA		OTU21	0	1	0	291		0.0158557		Archaea	Euryarchaeota	Thermoplasmata	Methanomassiliicoccales	Methanomassiliicoccaceae	Methanomassiliicoccus
OTU33	0	1	0	211		6.78637e-06		Bacteria	Firmicutes	Clostridia	Clostridiales	NA	NA		OTU140	1	1	40	21		0.0337773		Bacteria	NA	NA	NA	NA	NA		OTU96	0	1	0	73		0.0166637		Bacteria	Firmicutes	Clostridia	Clostridiales	Clostridiales_Incertae_Sedis_XIII	Anaerovorax
OTU38	0	1	0	146		3.54594e-05		Bacteria	Firmicutes	Clostridia	Clostridiales	Peptostreptococcaceae	Proteocatella		OTU51	1	1	71	205		0.0354154		Bacteria	Firmicutes	Bacilli	Lactobacillales	Carnobacteriaceae	NA		OTU7	0	1	0	222		0.0172838		Archaea	Euryarchaeota	Thermoplasmata	Methanomassiliicoccales	Methanomassiliicoccaceae	Methanomassiliicoccus
OTU22	0	1	0	151		6.49995e-05		Bacteria	Firmicutes	Clostridia	Clostridiales	Clostridiales_Incertae_Sedis_XIII	Anaerovorax		OTU25	1	1	249	168		0.0435856		Archaea	Euryarchaeota	Methanomicrobia	Methanosarcinales	Methanosarcinaceae	Methanomethylovorans		OTU51	0	1	0	71		0.0217777		Bacteria	Firmicutes	Bacilli	Lactobacillales	Carnobacteriaceae	NA
OTU28	0	1	0	178		0.000120152		Bacteria	Synergistetes	Synergistia	Synergistales	Synergistaceae	Aminomonas																	OTU71	0	1	0	64		0.0262979		Bacteria	Firmicutes	Bacilli	Lactobacillales	Carnobacteriaceae	Trichococcus
OTU40	0	1	0	149		0.000191059		Archaea	Euryarchaeota	Methanomicrobia	Methanomicrobiales	Methanospirillaceae	Methanospirillum		OTU35	1	0	98	0		0.0164012		Bacteria	Chloroflexi	Anaerolineae	Anaerolineales	Anaerolineaceae	Levilinea		OTU22	0	1	0	102		0.0269197		Bacteria	Firmicutes	Clostridia	Clostridiales	Clostridiales_Incertae_Sedis_XIII	Anaerovorax
OTU225	0	1	0	51		0.00027824		Bacteria	Proteobacteria	Alphaproteobacteria	Rhodospirillales	NA	NA		OTU96	1	0	73	0		0.0205687		Bacteria	Firmicutes	Clostridia	Clostridiales	Clostridiales_Incertae_Sedis_XIII	Anaerovorax		OTU86	0	1	0	35		0.0289908		Bacteria	Firmicutes	Clostridia	Clostridiales	Ruminococcaceae	Sporobacter
OTU46	0	1	0	127		0.00030975		Archaea	Euryarchaeota	Methanomicrobia	Methanomicrobiales	Methanospirillaceae	Methanospirillum		OTU71	1	0	64	0		0.0255209		Bacteria	Firmicutes	Bacilli	Lactobacillales	Carnobacteriaceae	Trichococcus		OTU46	0	1	0	119		0.0317839		Archaea	Euryarchaeota	Methanomicrobia	Methanomicrobiales	Methanospirillaceae	Methanospirillum
OTU21	0	1	0	152		0.000327966		Archaea	Euryarchaeota	Thermoplasmata	Methanomassiliicoccales	Methanomassiliicoccaceae	Methanomassiliicoccus		OTU165	1	0	55	0		0.0337972		Bacteria	Firmicutes	Clostridia	Clostridiales	NA	NA		OTU37	0	1	0	130		0.031796		Bacteria	Firmicutes	Clostridia	Clostridiales	NA	NA
OTU74	0	1	0	63		0.000620386		Bacteria	Firmicutes	Clostridia	Clostridiales	Ruminococcaceae	NA		OTU77	1	0	52	0		0.035179		Bacteria	Firmicutes	Clostridia	Clostridiales	Clostridiales_Incertae_Sedis_XIII	Anaerovorax		OTU220	0	1	0	44		0.03224		Bacteria	Synergistetes	Synergistia	Synergistales	Synergistaceae	Cloacibacillus
OTU70	0	1	0	61		0.000713184		Bacteria	Synergistetes	Synergistia	Synergistales	Synergistaceae	Fretibacterium		OTU220	1	0	44	0		0.0419919		Bacteria	Synergistetes	Synergistia	Synergistales	Synergistaceae	Cloacibacillus		OTU19	0	1	0	175		0.0327375		Bacteria	Firmicutes	Clostridia	NA	NA	NA
OTU73	0	1	0	35		0.000713433		Bacteria	Acidobacteria	Acidobacteria_Gp3	Paludibaculum	NA	NA																	OTU35	0	1	0	98		0.0388762		Bacteria	Chloroflexi	Anaerolineae	Anaerolineales	Anaerolineaceae	Levilinea
OTU19	0	1	0	203		0.00097333		Bacteria	Firmicutes	Clostridia	NA	NA	NA		OTU55	0	1	0	228		7.2148e-08		Bacteria	Firmicutes	Clostridia	Clostridiales	Clostridiales_Incertae_Sedis_XII	Fusibacter		OTU66	0	1	0	58		0.0404911		Bacteria	Synergistetes	Synergistia	Synergistales	Synergistaceae	Aminivibrio
OTU58	0	1	0	66		0.00103056		Bacteria	Firmicutes	Clostridia	Clostridiales	Clostridiaceae_1	Youngiibacter		OTU64	0	1	0	195		1.34167e-07		Bacteria	Firmicutes	Clostridia	Clostridiales	Peptostreptococcaceae	Acetoanaerobium		OTU77	0	1	0	52		0.0411151		Bacteria	Firmicutes	Clostridia	Clostridiales	Clostridiales_Incertae_Sedis_XIII	Anaerovorax
OTU59	0	1	0	37		0.00108389		Bacteria	Firmicutes	Clostridia	Clostridiales	Ruminococcaceae	Clostridium_III		OTU29	0	1	0	194		2.03635e-07		Bacteria	Firmicutes	Negativicutes	Selenomonadales	Veillonellaceae	NA		OTU154	0	1	0	44		0.0449154		Bacteria	Synergistetes	Synergistia	Synergistales	Synergistaceae	Lactivibrio
OTU78	0	1	0	122		0.00128301		Bacteria	Elusimicrobia	Endomicrobia	Candidatus_Endomicrobium	NA	NA		OTU94	0	1	0	98		1.85548e-06		Bacteria	Firmicutes	Clostridia	Clostridiales	Clostridiales_Incertae_Sedis_XIII	Anaerovorax		OTU165	0	1	0	55		0.0478551		Bacteria	Firmicutes	Clostridia	Clostridiales	NA	NA
OTU190	0	1	0	38		0.0022794		Bacteria	Elusimicrobia	Elusimicrobia	Elusimicrobiales	Elusimicrobiaceae	Elusimicrobium		OTU90	0	1	0	58		8.48678e-06		Bacteria	Firmicutes	Clostridia	Clostridiales	Lachnospiraceae	Fusicatenibacter
OTU239	0	1	0	32		0.00285032		Archaea	Euryarchaeota	Methanomicrobia	Methanomicrobiales	Methanoregulaceae	Methanoregula		OTU119	0	1	0	64		9.49069e-06		Bacteria	Firmicutes	Clostridia	Clostridiales	NA	NA
OTU87	0	1	0	36		0.00309969		Bacteria	Synergistetes	Synergistia	Synergistales	Synergistaceae	Cloacibacillus		OTU225	0	1	0	51		9.60939e-06		Bacteria	Proteobacteria	Alphaproteobacteria	Rhodospirillales	NA	NA
OTU86	0	1	0	42		0.00522496		Bacteria	Firmicutes	Clostridia	Clostridiales	Ruminococcaceae	Sporobacter		OTU197	0	1	0	52		2.89588e-05		Bacteria	Firmicutes	Clostridia	Clostridiales	Ruminococcaceae	Faecalibacterium
OTU72	0	1	0	86		0.00769037		Bacteria	Firmicutes	Clostridia	Clostridiales	NA	NA		OTU190	0	1	0	38		3.56184e-05		Bacteria	Elusimicrobia	Elusimicrobia	Elusimicrobiales	Elusimicrobiaceae	Elusimicrobium
OTU145	0	1	0	47		0.00868424		Bacteria	Firmicutes	Clostridia	Clostridiales	Christensenellaceae	Christensenella		OTU239	0	1	0	32		6.8275e-05		Archaea	Euryarchaeota	Methanomicrobia	Methanomicrobiales	Methanoregulaceae	Methanoregula
OTU95	0	1	0	36		0.0106078		Bacteria	Firmicutes	Clostridia	Clostridiales	Lachnospiraceae	Clostridium_XlVa		OTU230	0	1	0	35		0.000126682		Bacteria	Firmicutes	Clostridia	Clostridiales	Ruminococcaceae	Intestinimonas
OTU230	0	1	0	35		0.0236321		Bacteria	Firmicutes	Clostridia	Clostridiales	Ruminococcaceae	Intestinimonas
OTU50	0	1	0	46		0.0236542		Bacteria	Firmicutes	Clostridia	Clostridiales	Peptostreptococcaceae	Intestinibacter

## Sheet: #5 - Figure 3 KOs
The 15 most extreme KO vectors in each PCoA plot
	0 meters
	PCoA cluster	KO entry	Name	Definition	Functionality
	Untreated	K00936	pdtaS;	two-component system, sensor histidine kinase PdtaS [EC:2.7.13.3]	Environment sensing, signal transduction
		K06147	ABCB-BAC;	ATP-binding cassette, subfamily B, bacterial	Environment sensing, signal transduction
		K02003	ABC.CD.A;	putative ABC transport system ATP-binding protein	Environment sensing, signal transduction
		K13789	GGPS;	geranylgeranyl diphosphate synthase, type II [EC:2.5.1.1 2.5.1.10 2.5.1.29]	Metabolic pathways
		K02006	cbiO;	cobalt/nickel transport system ATP-binding protein	Environment sensing, signal transduction
		K01990	ABC-2.A;	ABC-2 type transport system ATP-binding protein	Environment sensing, signal transduction
	Fe(III) cluster	K02027	ABC.MS.S;	multiple sugar transport system substrate-binding protein	Metabolic pathways
		K02025	ABC.MS.P;	multiple sugar transport system permease protein	Metabolic pathways
		K02026	ABC.MS.P1;	multiple sugar transport system permease protein	Metabolic pathways
		K00540	Unknown	Unknown	Unknown
		K07075	K07075;	uncharacterized protein	Unknown
		K02483	K02483;	two-component system, OmpR family, response regulator	Environment sensing, signal transduction
		K02484	K02484;	two-component system, OmpR family, sensor kinase [EC:2.7.13.3]	Environment sensing, signal transduction
		K02014	TC.FEV.OM;	iron complex outermembrane recepter protein	Other Transporters
		K03406	mcp;	methyl-accepting chemotaxis protein	Environment sensing, signal transduction
	100 meters
	PCoA cluster	KO entry	Name	Definition	Functionality
	Fe(II) cluster	K02014	TC.FEV.OM;	iron complex outermembrane recepter protein	Other transporters
		K03406	mcp;	methyl-accepting chemotaxis protein	Environment sensing, signal transduction
		K06147	ABCB-BAC;	ATP-binding cassette, subfamily B, bacterial	Environment sensing, signal transduction
		K02003	ABC.CD.A;	putative ABC transport system ATP-binding protein	Environment sensing, signal transduction
		K03088	rpoE;	RNA polymerase sigma-70 factor, ECF subfamily	Transcription
	Fe(III) cluster	K02529	lacI, galR;	LacI family transcriptional regulator	Transcription factor
		K02027	ABC.MS.S;	multiple sugar transport system substrate-binding protein	Metabolic pathways
		K02025	ABC.MS.P;	multiple sugar transport system permease protein	Metabolic pathways
		K02026	ABC.MS.P1;	multiple sugar transport system permease protein	Metabolic pathways
		K02056	ABC.SS.A;	simple sugar transport system ATP-binding protein [EC:3.6.3.17]	Metabolic pathways
		K02057	ABC.SS.P;	simple sugar transport system permease protein	Metabolic pathways
		K00854	xylB, XYLB;	xylulokinase [EC:2.7.1.17]	Metabolic pathways
		K00059	fabG;	3-oxoacyl-[acyl-carrier protein] reductase [EC:1.1.1.100]	Metabolic pathways
		K01704	leuC, IPMI-L;	3-isopropylmalate/(R)-2-methylmalate dehydratase large subunit [EC:4.2.1.33 4.2.1.35]	Metabolic pathways
		K01703	leuD, IPMI-S;	3-isopropylmalate/(R)-2-methylmalate dehydratase small subunit [EC:4.2.1.33 4.2.1.35]	Metabolic pathways
	200 meter
	PCoA cluster	KO entry	Name	Definition	Functionality
	Fe(II) cluster	K02014	TC.FEV.OM;	iron complex outermembrane recepter protein	Other transporter
		K00540		Unknown	Unknown
		K02026	ABC.MS.P1;	multiple sugar transport system permease protein	Metabolic pathways
		K02025	ABC.MS.P;	multiple sugar transport system permease protein	Metabolic pathways
		K02027	ABC.MS.S;	multiple sugar transport system substrate-binding protein	Metabolic pathways
		K02529	lacI, galR;	LacI family transcriptional regulator	Transcription
		K00266	gltD;	glutamate synthase (NADPH/NADH) small chain [EC:1.4.1.13 1.4.1.14]	Metabolic pathways
		K02003	ABC.CD.A;	putative ABC transport system ATP-binding protein	Environment sensing, signal transduction
		K06147	ABCB-BAC;	ATP-binding cassette, subfamily B, bacterial	Environment sensing, signal transduction
		K07024	SPP;	sucrose-6-phosphatase&#160; [EC:3.1.3.24]	Metabolic pathways
	Untreated	K03091	sigH;	RNA polymerase sporulation-specific sigma factor	Transcription
	Fe(III) cluster	K01952	purL,	PFAS; phosphoribosylformylglycinamidine synthase [EC:6.3.5.3]	Metabolic pathways
		K01704	leuD,	IPMI-S; 3-isopropylmalate/(R)-2-methylmalate dehydratase small subunit [EC:4.2.1.33 4.2.1.35]	Metabolic pathways
		K01703	leuC,	IPMI-L; 3-isopropylmalate/(R)-2-methylmalate dehydratase large subunit [EC:4.2.1.33 4.2.1.35]	Metabolic pathways
		K00059	fabG;	3-oxoacyl-[acyl-carrier protein] reductase [EC:1.1.1.100]	Metabolic pathways

## Sheet: #6 - Figure 5 KOs
Sulfate reducers
	KEGG	KO	Definition	KEGG module
Sulfate transport	cysP	K02048	sulfate transport system substrate-binding protein	M00185 Sulfate transport system
Assimilatory sulfate reduction	cysNC	K00955	bifunctional enzyme CysN/CysC	M00176 Assimilatory sulfate reduction, sulfate => H2S
	cysH	K00390	phosphoadenosine phosphosulfate reductase	M00176 Assimilatory sulfate reduction, sulfate => H2S
	cysJ	K00380	sulfite reductase (NADPH) flavoprotein alpha-component	M00176 Assimilatory sulfate reduction, sulfate => H2S
	sir	K00392	sulfite reductase (ferredoxin)	M00176 Assimilatory sulfate reduction, sulfate => H2S
Dissimilatory sulfate reduction oxidation	sat	K00958	sulfate adenylyltransferase	M00596 Dissimilatory sulfate reduction, sulfate => H2S
	aprA	K00394	adenylylsulfate reductase, subunit A	M00596 Dissimilatory sulfate reduction, sulfate => H2S
	dsrA	K11180	dissimilatory sulfite reductase alpha subunit	M00596 Dissimilatory sulfate reduction, sulfate => H2S
Methane producers
	KEGG	KO	Definition	KEGG modules
Formate metabolism	FDH	K00122	formate dehydrogenase
	fmdA	K00200	formylmethanofuran dehydrogenase subunit A	M00567 Methanogenesis, CO2 => methane
Methanogenesis	mtrA	K00577	tetrahydromethanopterin S-methyltransferase subunit A	M00357 Methanogenesis, acetate => methane
	mcrA	K00399	methyl-coenzyme M reductase alpha subunit	M00567 Methanogenesis, CO2 => methane M00357 Methanogenesis, acetate => methane M00356 Methanogenesis, methanol => methane M00563 Methanogenesis, methylamine/dimethylamine/trimethylamine => methane
	hdrA2	K03388	heterodisulfide reductase subunit A	M00567 Methanogenesis, CO2 => methane M00357 Methanogenesis, acetate => methane M00356 Methanogenesis, methanol => methane M00563 Methanogenesis, methylamine/dimethylamine/trimethylamine => methane
